# Supplementary material
Source: Springer Nature journal article supplement (https://www.springermedizin.de/resource/supplementary/12889_2011_3656_MOESM1_ESM.pdf/9489774)
Supplement: MOESM1 [file 9489774]

**Enrollment**

Schools invited to participate (n=)

Schools consented (n = )

Participants assessed for eligibility (n = )

Excluded (n = )

Participants attending baseline assessments (n = )

Randomized by school (n = )

Allocated to Fit-4-Fun intervention schools (n=)

Allocated to wait-list control schools (n = )

**Allocation**

Lost to follow-up (give reasons) (n= )

**10-week Follow-Up**

Lost to follow-up (give reasons) (n= )

Lost to follow-up (give reasons) (n= )

**6-month Follow-Up**

Lost to follow-up (give reasons) (n= )

**Analysis**

Analysed (n=)

◆ Excluded from analysis (reason) (n= )

Analysed (n=)

◆ Excluded from analysis( reason) (n= )
